# Supplementary material for: A lipasin/Angptl8 monoclonal antibody lowers mouse serum triglycerides involving increased postprandial activity of the cardiac lipoprotein lipase
Source: PubMed Central journal article supplement (PMC4685196; doi:10.1038/srep18502), 2015-12-21
Supplement: srep18502-s1.pdf [file srep18502-s1.pdf]

# A lipasin/Angptl8 monoclonal antibody lowers mouse serum triglycerides involving increased postprandial activity of the cardiac lipoprotein lipase

Zhiyao Fu, Abdul B. Abou-Samra and Ren Zhang

## Supplemental Materials

### Supplementary Figure 1. The peptide library for epitope mapping

|    |                  |    |                    |    |                  |
|----|------------------|----|--------------------|----|------------------|
| 1  | MAVLALSLLWTLASA  | 22 | GHSLGLYDRALEFLG    | 43 | RDTVRRLLQVQLRGAW |
| 2  | LALSLLWTLASAVRP  | 23 | LGLYDRALEFLGTEV    | 44 | VRRLLQVQLRGAWLGQ |
| 3  | SLLWTLASAVRPAPV  | 24 | YDRALEFLGTEVRQG    | 45 | LQVQLRGAWLGQAHQ  |
| 4  | WTLASAVRPAPVAPL  | 25 | ALEFLGTEVRQGQDA    | 46 | QLRGAWLGQAHQEF   |
| 5  | ASAVRPAPVAPLGGP  | 26 | FLGTEVRQGQDATQE    | 47 | GAWLGQAHQEFETLK  |
| 6  | VRPAPVAPLGGPEPA  | 27 | TEVRQGQDATQELRT    | 48 | LGQAHQEFETLKARA  |
| 7  | APVAPLGGPEPAQYE  | 28 | RQGQDATQELRTSLS    | 49 | AHQEFETLKARADKQ  |
| 8  | APLGGPEPAQYEELT  | 29 | QDATQELRTSLSEIQ    | 50 | EFETLKARADKQSHL  |
| 9  | GGPEPAQYEELTLLF  | 30 | TQELRTSLSEIQVEE    | 51 | TLKARADKQSHLLWA  |
| 10 | EPAQYEELTLLFHGA  | 31 | LRTSLSEIQVEEDAL    | 52 | ARADKQSHLLWALTG  |
| 11 | QYEELTLLFHGALQL  | 32 | SLSEIQVEEDALHLR    | 53 | DKQSHLLWALTGHVQ  |
| 12 | ELTLLFHGALQLGQA  | 33 | EIQVEEDALHLRAEA    | 54 | SHLLWALTGHVQRQQ  |
| 13 | LLFHGALQLGQALNG  | 34 | VEEDALHLRAEATAR    | 55 | LWALTGHVQRQQREM  |
| 14 | HGALQLGQALNGVYR  | 35 | DALHLRAEATARS LG   | 56 | LTGHVQRQQREMAEQ  |
| 15 | LQLGQALNGVYRATE  | 36 | HLRAEATARS LG EVA  | 57 | HVQRQQREMAEQQW   |
| 16 | GQALNGVYRATEARL  | 37 | AEATARS LG EVARAQ  | 58 | RQQREMAEQQWLRQ   |
| 17 | LNGVYRATEARL TEA | 38 | TARS LG EVARAQ QAL | 59 | REMAEQQWLRQIQQ   |
| 18 | VYRATEARL TEAGHS | 39 | SLGEVARAQ QALRDT   | 60 | AEQQWLRQIQQLRH   |
| 19 | ATEARL TEAGHSLGL | 40 | EVARAQ QALRDTVRR   | 61 | QQWLRQIQQLRHTAA  |
| 20 | ARL TEAGHSLGLYDR | 41 | RAQQALRDTVRRLLQV   | 62 | LRQIQQLRHTAALPA  |
| 21 | TEAGHSLGLYDRALE  | 42 | QALRDTVRRLLQVQLR   |    |                  |

### Supplementary Figure 1

A peptide library was generated containing 62 15-amino-acid long peptide with 12 amino-acid overlapping. All cysteines in the peptides were replaced with serines and the peptides were synthesized with N-terminal biotinylation.

**Supplementary table 1. ELISA for recombinant lipasin using the monoclonal antibody AB-2**

|                      | Dilution | AB-2 (A450nm) |
|----------------------|----------|---------------|
| 1                    | 1:1,000  | 1.437         |
| 2                    | 1:3,000  | 1.436         |
| 3                    | 9,000    | 1.409         |
| 4                    | 27,000   | 1.327         |
| 5                    | 81,000   | 1.180         |
|                      | Blank    | 0.085         |
| The titer: >1:81,000 |          |               |

Starting dilution: 1:1,000 (equivalent to 1 $\mu$ g/ml)

The titer is the highest dilution with Positive/Blank > 2.1.

ELISA antigen: recombinant lipasin

Coating: 1  $\mu$ g/ml, 100  $\mu$ l/well

Coating buffer: phosphate buffered saline, pH 7.4

Secondary antibody: Goat anti-mouse IgG (H+L), HRP conjugated.

**Supplementary Table 2. ELISA verification of the AB-2 binding peptides**

|                      | 28    | 29    | 30           | 31           | 32           | 33           | 34    | 35    |
|----------------------|-------|-------|--------------|--------------|--------------|--------------|-------|-------|
| AB-2 0.5 µg/ml       | 0.055 | 0.105 | <b>1.177</b> | <b>1.148</b> | <b>1.057</b> | <b>0.729</b> | 0.093 | 0.06  |
| AB-2 -0.1 µg/ml      | 0.056 | 0.069 | <b>0.915</b> | <b>0.851</b> | <b>0.441</b> | <b>0.238</b> | 0.063 | 0.056 |
| AB-2 0.02 µg/ml      | 0.057 | 0.058 | <b>0.574</b> | <b>0.544</b> | <b>0.183</b> | 0.082        | 0.054 | 0.053 |
| ControlAb-0.5 µg/ml  | 0.059 | 0.063 | 0.060        | 0.059        | 0.061        | 0.060        | 0.060 | 0.059 |
| ControlAb-0.1 µg/ml  | 0.054 | 0.058 | 0.057        | 0.056        | 0.056        | 0.056        | 0.057 | 0.055 |
| ControlAb-0.02 µg/ml | 0.052 | 0.056 | 0.054        | 0.057        | 0.054        | 0.055        | 0.055 | 0.058 |
| 1×PBS                | 0.058 | 0.053 | 0.052        | 0.050        | 0.051        | 0.052        | 0.051 | 0.050 |
